# Supplementary material for: Airway driving pressure and lung stress in ARDS patients
Source: Springer Nature journal article supplement (doi:10.1186/s13054-016-1446-7), 2016-08-20

# **Airway driving pressure and lung stress in ARDS patients**

Davide Chiumello MD<sup>1,2</sup>, Eleonora Carlesso MSc<sup>2</sup>, Matteo Brioni MD<sup>2</sup>, Massimo Cressoni MD<sup>2</sup>

<sup>1</sup> Dipartimento di Anestesia, Rianimazione ed Emergenza-Urgenza, Fondazione IRCCS Ca' Granda - Ospedale Maggiore Policlinico, Milano, Italy

<sup>2</sup> Dipartimento di Fisiopatologia Medico-Chirurgica e dei Trapianti, Università degli Studi di Milano, Italy

Additional file 1

**Table S1.** Patients characteristic according to intensive care unit outcome.

|                                                                                       | <b>Survivors<br/>(N=102)</b> | <b>Non-survivors<br/>(N=48)</b> | <b>P value</b> |
|---------------------------------------------------------------------------------------|------------------------------|---------------------------------|----------------|
| <b>Age (years)</b>                                                                    | 61.0 [45.0 – 74.0]           | 65.5 [52.5 – 72.5]              | 0.17           |
| <b>Male sex, N (%)</b>                                                                | 73 (71.6)                    | 29 (60.4)                       | 0.239          |
| <b>Body mass index (kg/m<sup>2</sup>)</b>                                             | 24.7 [22.9 – 27.7]           | 24.6 [22.6 – 30.1]              | 0.64           |
| <b>PaO<sub>2</sub>/FiO<sub>2</sub> ratio</b>                                          | 211 [156 – 257]              | 160 [117 – 170]                 | < 0.0001       |
| <b>PaCO<sub>2</sub> (mmHg)*</b>                                                       | 38.1 [35.0 – 43.6]           | 43.1 [36 – 48.3]                | 0.019          |
| <b>Respiratory system elastance (cmH<sub>2</sub>O/L)<sup>°</sup></b>                  | 22.9 [20.0 – 28.7]           | 28.1 [23.2 – 35.2]              | 0.016          |
| <b>Tidal volume (mL/kg<sub>IBW</sub>)*</b>                                            | 8.3 [7.1 – 9.3]              | 7.8 [6.7 – 8.6]                 | 0.22           |
| <b>PEEP (cmH<sub>2</sub>O)*</b>                                                       | 10.0 [10.0 – 12.5]           | 10.0 [10.0 – 14.0]              | 0.055          |
| <b>Respiratory rate (breaths/min)*</b>                                                | 13.0 [11.0 – 16.5]           | 16.5 [14.0 – 20.0]              | < 0.01         |
| <b>Airway driving pressure at PEEP 5 cmH<sub>2</sub>O (cmH<sub>2</sub>O)</b>          | 12.2 [10.2 – 14.3]           | 13.8 [10.7 – 16.4]              | 0.047          |
| <b>Transpulmonary driving pressure at PEEP 5 cmH<sub>2</sub>O (cmH<sub>2</sub>O)</b>  | 8.9 [7.0 – 10.9]             | 10.0 [7.7 – 13.2]               | 0.057          |
| <b>Lung stress at PEEP 5 cmH<sub>2</sub>O (cmH<sub>2</sub>O)</b>                      | 12.9 [10.7 – 15.5]           | 14.0 [11.0 – 16.4]              | 0.32           |
| <b>Airway driving pressure at PEEP 15 cmH<sub>2</sub>O (cmH<sub>2</sub>O)</b>         | 13.0 [11.2 – 16.5]           | 14.1 [11.4 – 17.1]              | 0.37           |
| <b>Transpulmonary driving pressure at PEEP 15 cmH<sub>2</sub>O (cmH<sub>2</sub>O)</b> | 9.3 [7.3 – 12.2]             | 10.0 [8.2 – 12.0]               | 0.19           |
| <b>Lung stress at PEEP 15 cmH<sub>2</sub>O (cmH<sub>2</sub>O)</b>                     | 20.4 [18.0 – 23.1]           | 21.1 [17.8 – 23.6]              | 0.57           |
| <b>Total gas at PEEP 5 cmH<sub>2</sub>O (mL)<sup>#</sup></b>                          | 1133 [783 – 1662]            | 933 [662 – 1701]                | 0.20           |
| <b>Total tissue at PEEP 5 cmH<sub>2</sub>O (g)<sup>§</sup></b>                        | 1391 [1199 – 1670]           | 1395 [1074 – 1686]              | 0.58           |
| • <b>Not inflated tissue (%)<sup>§</sup></b>                                          | 44.9 [38.4 – 57.3]           | 47.5 [31.2 – 56.1]              | 0.80           |
| • <b>Poorly inflated tissue (%)<sup>§</sup></b>                                       | 27.9 [20.1 – 38.3]           | 29.1 [20.4 – 39.7]              | 0.51           |
| • <b>Well inflated tissue (%)<sup>§</sup></b>                                         | 25.7 [13.8 – 34.3]           | 22.6 [14.2 – 32.7]              | 0.42           |
| • <b>Over inflated tissue (%)<sup>§</sup></b>                                         | 0.01 [0.00 – 0.10]           | 0.02 [0.00 – 0.24]              | 0.24           |
| <b>Lung recruitability (%)<sup>§</sup></b>                                            | 12.6 [7.0 – 21.9]            | 16.3 [8.6 – 25.9]               | 0.268          |

Statistical Analysis: Student 's t –test, Mann-Whitney Rank sum Test, Chi-Square, as appropriate.

Abbreviations: PaO<sub>2</sub>: arterial partial pressure of oxygen; FiO<sub>2</sub>: inspired fraction of oxygen; PaCO<sub>2</sub>: arterial partial pressure of carbon dioxide; PEEP: positive end-expiratory pressure.

\* Data available for 97 patients in the “survivors” group and for 46 patients in the “non-survivors” group.

° Data available for 42 patients in the “survivors” group and for 30 patients in the “non-survivors” group.

# Total gas was computed by CT scan analysis (for 53 in the “survivor” group, and for 38 patients in the “non-survivors” group, respectively), or by helium dilution technique (for 48 in the “survivor” group, and for 10 patients in the “non-survivors” group, respectively).

§ Data available for 53 patients in the “survivors” group and for 38 patients in the “non-survivors” group.

**Table S2.** Baseline characteristics of the study population divided according to lower or higher airway driving pressure at PEEP 5 cmH<sub>2</sub>O.

| Characteristics                                   | Overall population (N=150) | Lower airway driving pressure (<15 cmH <sub>2</sub> O) (N=108) | Higher airway driving pressure (≥15 cmH <sub>2</sub> O) (N=42) | P value |
|---------------------------------------------------|----------------------------|----------------------------------------------------------------|----------------------------------------------------------------|---------|
| Age (years)                                       | 62 [47 – 74]               | 64 [49 – 74]                                                   | 57 [45 – 75]                                                   | 0.339   |
| Male sex, N (%)                                   | 102 (68.0)                 | 75 (69.4)                                                      | 27 (51.9)                                                      | 0.679   |
| Body Mass Index (kg/m <sup>2</sup> )              | 24.7 [22.8 – 27.7]         | 24.2 [22.5 – 27.5]                                             | 25.9 [23.9 – 29.0]                                             | 0.041   |
| ICU mortality, N (%)                              | 48 (32.0)                  | 29 (26.9)                                                      | 19 (45.2)                                                      | 0.049   |
| Cause of lung injury, N (%):                      |                            |                                                                |                                                                |         |
| • Sepsis                                          | 46 (30.7)                  | 36 (33.3)                                                      | 10 (23.8)                                                      | 0.739   |
| • Penumonia                                       | 56 (37.3)                  | 40 (37.0)                                                      | 16 (38.1)                                                      |         |
| • Trauma                                          | 15 (10.0)                  | 10 (9.3)                                                       | 5 (11.9)                                                       |         |
| • Aspiration                                      | 7 (4.7)                    | 4 (3.7)                                                        | 3 (7.1)                                                        |         |
| • Other                                           | 26 (17.3)                  | 18 (16.7)                                                      | 8 (19.0)                                                       |         |
| ARDS category at PEEP 5 cmH <sub>2</sub> O, N(%): | (n=91)                     | (n=59)                                                         | (n=32)                                                         |         |
| • Mild                                            | 16 (17.6)                  | 11 (18.6)                                                      | 5 (15.6)                                                       | 0.553   |
| • Moderate                                        | 50 (54.9)                  | 34 (57.6)                                                      | 16 (50.0)                                                      |         |
| • Severe                                          | 25 (27.5)                  | 14 (23.7)                                                      | 11 (34.4)                                                      |         |

Statistical Analysis: Mann-Whitney Rank Sum Test, Chi-Square, as appropriate.

Abbreviations: ICU: intensive care unit; ARDS: acute respiratory distress syndrome; PEEP: positive end-expiratory pressure.

**Table S3.** Respiratory mechanics, gas exchange, CT scan variables and outcome of the patients divided according to lower or higher airway driving pressure at PEEP 5 cmH<sub>2</sub>O and 15 cmH<sub>2</sub>O.

|                                                                                      | Variable                                                     | Lower airway driving pressure (<15 cmH <sub>2</sub> O) at PEEP 15 cmH <sub>2</sub> O | Higher airway driving pressure (≥15 cmH <sub>2</sub> O) at PEEP 15 cmH <sub>2</sub> O | P value            |
|--------------------------------------------------------------------------------------|--------------------------------------------------------------|--------------------------------------------------------------------------------------|---------------------------------------------------------------------------------------|--------------------|
| Lower airway driving pressure (<15 cmH <sub>2</sub> O) at PEEP 5 cmH <sub>2</sub> O  | Number of patients                                           | 85                                                                                   | 23                                                                                    |                    |
|                                                                                      | Airway driving pressure (cmH <sub>2</sub> O)                 | 11.0 [9.7 – 12.4]                                                                    | 13.5 [12.2 – 14.0]                                                                    | <0.001             |
|                                                                                      | Transpulmonary driving pressure (cmH <sub>2</sub> O)         | 7.8 [6.2 – 9.2]                                                                      | 9.7 [7.7 – 10.7]                                                                      | 0.002 <sup>§</sup> |
|                                                                                      | End-Inspiratory airway plateau pressure (cmH <sub>2</sub> O) | 16.7 [15.1 – 18.0]                                                                   | 20.0 [18.0 – 21.1]                                                                    | <0.001             |
|                                                                                      | Lung stress (cmH <sub>2</sub> O)                             | 11.5 [9.8 – 13.7]                                                                    | 13.8 [11.5 – 15.5]                                                                    | 0.003 <sup>§</sup> |
|                                                                                      | Respiratory system elastance (cmH <sub>2</sub> O/L)          | 21.3 [17.8 – 25.5]                                                                   | 26.5 [21.3 – 27.7]                                                                    | 0.011              |
|                                                                                      | Lung elastance (cmH <sub>2</sub> O/L)                        | 14.8 [12.6 – 18.0]                                                                   | 19.8 [14.7 – 21.0]                                                                    | 0.028              |
|                                                                                      | Chest wall elastance (cmH <sub>2</sub> O/L)                  | 5.6 [4.1 – 8.8]                                                                      | 6.2 [4.9 – 8.4]                                                                       | 0.467              |
|                                                                                      | PaCO <sub>2</sub> (mmHg)*                                    | 43.9 [39.5 – 50.6]                                                                   | 42.0 [36.9 – 48.2]                                                                    | 0.467              |
|                                                                                      | PaO <sub>2</sub> /FiO <sub>2</sub> ratio*                    | 143 [99 – 170]                                                                       | 212 [136 – 300]                                                                       | 0.004 <sup>§</sup> |
|                                                                                      | Total lung gas (mL) <sup>o</sup>                             | 1236 [839 – 1912]                                                                    | 1210 [944 – 1669]                                                                     | 0.900              |
|                                                                                      | Total lung tissue weight (g)*                                | 1397 [1212 – 1832]                                                                   | 1200 [1115 – 1338]                                                                    | 0.077              |
|                                                                                      | • Not-aerated lung tissue (%)*                               | 45.9 [35.9 – 56.2]                                                                   | 39.4 [37.0 – 42.2]                                                                    | 0.167 <sup>§</sup> |
|                                                                                      | • Poorly-aerated lung tissue (%)*                            | 27.1 [20.0 – 37.3]                                                                   | 29.9 [21.7 – 34.0]                                                                    | 0.950              |
|                                                                                      | • Well-aerated lung tissue (%)*                              | 27.4 [15.9 – 34.4]                                                                   | 31.5 [29.8 – 39.3]                                                                    | 0.066 <sup>§</sup> |
|                                                                                      | • Over-aerated lung tissue (%)*                              | 0.03 [0.00 – 0.29]                                                                   | 0.08 [0.01 – 0.11]                                                                    | 0.716              |
| Lung recruitability (%)*                                                             | 12.6 [7.9 – 23.4]                                            | 5.6 [2.5 – 18.3]                                                                     | 0.123                                                                                 |                    |
| ICU mortality N (%)                                                                  | 24 (28.2)                                                    | 5 (21.7)                                                                             | 0.720                                                                                 |                    |
| Higher airway driving pressure (≥15 cmH <sub>2</sub> O) at PEEP 5 cmH <sub>2</sub> O | Number of patients                                           | 12                                                                                   | 30                                                                                    |                    |
|                                                                                      | Airway driving pressure (cmH <sub>2</sub> O)                 | 15.6 [15.4 – 16.6]                                                                   | 17.4 [16.4 – 19.1]                                                                    | 0.013              |
|                                                                                      | Transpulmonary driving pressure (cmH <sub>2</sub> O)         | 12.8 [10.8 – 14.0]                                                                   | 14.2 [11.8 – 15.1]                                                                    | 0.215 <sup>§</sup> |
|                                                                                      | End-Inspiratory airway plateau pressure (cmH <sub>2</sub> O) | 21.0 [20.3 – 21.8]                                                                   | 23.0 [21.4 – 24.3]                                                                    | 0.010              |
|                                                                                      | Lung stress (cmH <sub>2</sub> O)                             | 16.9 [15.4 – 18.9]                                                                   | 17.7 [15.4 – 19.8]                                                                    | 0.389 <sup>§</sup> |
|                                                                                      | Respiratory system elastance (cmH <sub>2</sub> O/L)          | 33.4 [28.4 – 38.0]                                                                   | 33.8 [29.8 – 40.4]                                                                    | 0.707              |
|                                                                                      | Lung elastance (cmH <sub>2</sub> O/L)                        | 27.4 [20.4 – 32.7]                                                                   | 27.1 [21.8 – 31.6]                                                                    | 0.967              |
|                                                                                      | Chest wall elastance (cmH <sub>2</sub> O/L)                  | 7.0 [4.6 – 9.5]                                                                      | 8.2 [4.5 – 11.6]                                                                      | 0.646              |
|                                                                                      | PaCO <sub>2</sub> (mmHg) <sup>#</sup>                        | 41.6 [40.1 – 47.6]                                                                   | 50.0 [43.2 – 53.3]                                                                    | 0.016 <sup>§</sup> |
|                                                                                      | PaO <sub>2</sub> /FiO <sub>2</sub> ratio <sup>#</sup>        | 113 [80 – 210]                                                                       | 134 [82 – 176]                                                                        | 0.958 <sup>§</sup> |
|                                                                                      | Total lung gas (mL) <sup>+</sup>                             | 665 [471 – 812]                                                                      | 726 [562 – 960]                                                                       | 0.351              |
|                                                                                      | Total lung tissue weight (g) <sup>#</sup>                    | 1449 [1107 – 1649]                                                                   | 1466 [1046 – 1702]                                                                    | 0.685 <sup>§</sup> |
|                                                                                      | • Not-aerated lung tissue (%) <sup>#</sup>                   | 52.4 [26.9 – 64.7]                                                                   | 48.7 [33.5 – 58.9]                                                                    | 0.886 <sup>§</sup> |
|                                                                                      | • Poorly-aerated lung tissue (%) <sup>#</sup>                | 27.3 [21.1 – 43.6]                                                                   | 38.0 [20.2 – 42.5]                                                                    | 0.466 <sup>§</sup> |
|                                                                                      | • Well-aerated lung tissue (%) <sup>#</sup>                  | 16.8 [9.3 – 27.2]                                                                    | 15.0 [8.1 – 26.3]                                                                     | 0.704 <sup>§</sup> |
|                                                                                      | • Over-aerated lung tissue (%) <sup>#</sup>                  | 0.00 [0.00 – 0.01]                                                                   | 0.00 [0.00 – 0.04]                                                                    | 0.905              |
| Lung recruitability (%) <sup>#</sup>                                                 | 17.2 [6.1 – 28.6]                                            | 19.9 [10.4 – 26.2]                                                                   | 0.550 <sup>§</sup>                                                                    |                    |
| ICU mortality N (%)                                                                  | 4 (33.3)                                                     | 15 (50.0)                                                                            | 0.524                                                                                 |                    |

Lung mechanics, gas exchange, CT-related variables and lung total gas were determined at PEEP 5 cmH<sub>2</sub>O.

Statistical Analysis: Student's t-test<sup>§</sup>, Mann-Whitney Rank Sum Test, Chi-Square, as appropriate.

Abbreviations: PaO<sub>2</sub>: arterial partial pressure of oxygen; FiO<sub>2</sub>: inspired fraction of oxygen; PaCO<sub>2</sub>: arterial partial pressure of carbon dioxide; ICU: intensive care unit; PEEP: positive end-expiratory pressure.

\* Data available for 53 patients in the “lower airway driving pressure at PEEP 15 cmH<sub>2</sub>O” group and for 6 patients in the “higher airway driving pressure at PEEP 15 cmH<sub>2</sub>O” group.

° Total gas was computed either by CT scan analysis (in 53 patients of the “lower airway driving pressure at PEEP 15 cmH<sub>2</sub>O” group, and in 6 patients of the “higher airway driving pressure at PEEP 15 cmH<sub>2</sub>O” group, respectively), or by helium dilution technique (in 31 patients of the “lower airway driving pressure at PEEP 15 cmH<sub>2</sub>O” group, and in 17 patients of the “higher airway driving pressure at PEEP 15 cmH<sub>2</sub>O” group, respectively).

# Data available for 11 patients in the “lower airway driving pressure at PEEP 15 cmH<sub>2</sub>O” group and for 21 patients in the “higher airway driving pressure at PEEP 15 cmH<sub>2</sub>O” group.

+ Total gas was computed either by CT scan analysis (in 11 patients of the “lower airway driving pressure at PEEP 15 cmH<sub>2</sub>O” group, and in 21 patients of the “higher airway driving pressure at PEEP 15 cmH<sub>2</sub>O” group, respectively), or by helium dilution technique (in one patient of the “lower airway driving pressure at PEEP 15 cmH<sub>2</sub>O” group, and in 9 patients of the “higher airway driving pressure at PEEP 15 cmH<sub>2</sub>O” group, respectively).

**Table S4.** Sensibility, specificity, positive and negative predictive values of optimal cut off for airway and transpulmonary driving pressure to predict a lung stress equal or above 24 or 26 cmH<sub>2</sub>O.

|                                                                        | <b>Sensitivity</b> | <b>Specificity</b> | <b>Positive predictive value</b> | <b>Negative predictive value</b> |
|------------------------------------------------------------------------|--------------------|--------------------|----------------------------------|----------------------------------|
| <i>Lung stress equal or above 24 cmH<sub>2</sub>O</i>                  |                    |                    |                                  |                                  |
| <b>Airway driving pressure (cut off 15.0 cmH<sub>2</sub>O)</b>         | 0.90               | 0.78               | 0.80                             | 0.88                             |
| <b>Transpulmonary driving pressure (cut off 11.7 cmH<sub>2</sub>O)</b> | 0.97               | 0.89               | 0.90                             | 0.96                             |
| <i>Lung stress equal or above 26 cmH<sub>2</sub>O</i>                  |                    |                    |                                  |                                  |
| <b>Airway driving pressure (cut off 16.6 cmH<sub>2</sub>O)</b>         | 0.81               | 0.80               | 0.80                             | 0.81                             |
| <b>Transpulmonary driving pressure (cut off 11.8 cmH<sub>2</sub>O)</b> | 0.94               | 0.82               | 0.84                             | 0.93                             |

**Figure S1.** Linear regression between respiratory system elastance (cmH<sub>2</sub>O/L) and lung gas volume at PEEP 5 cmH<sub>2</sub>O (mL).

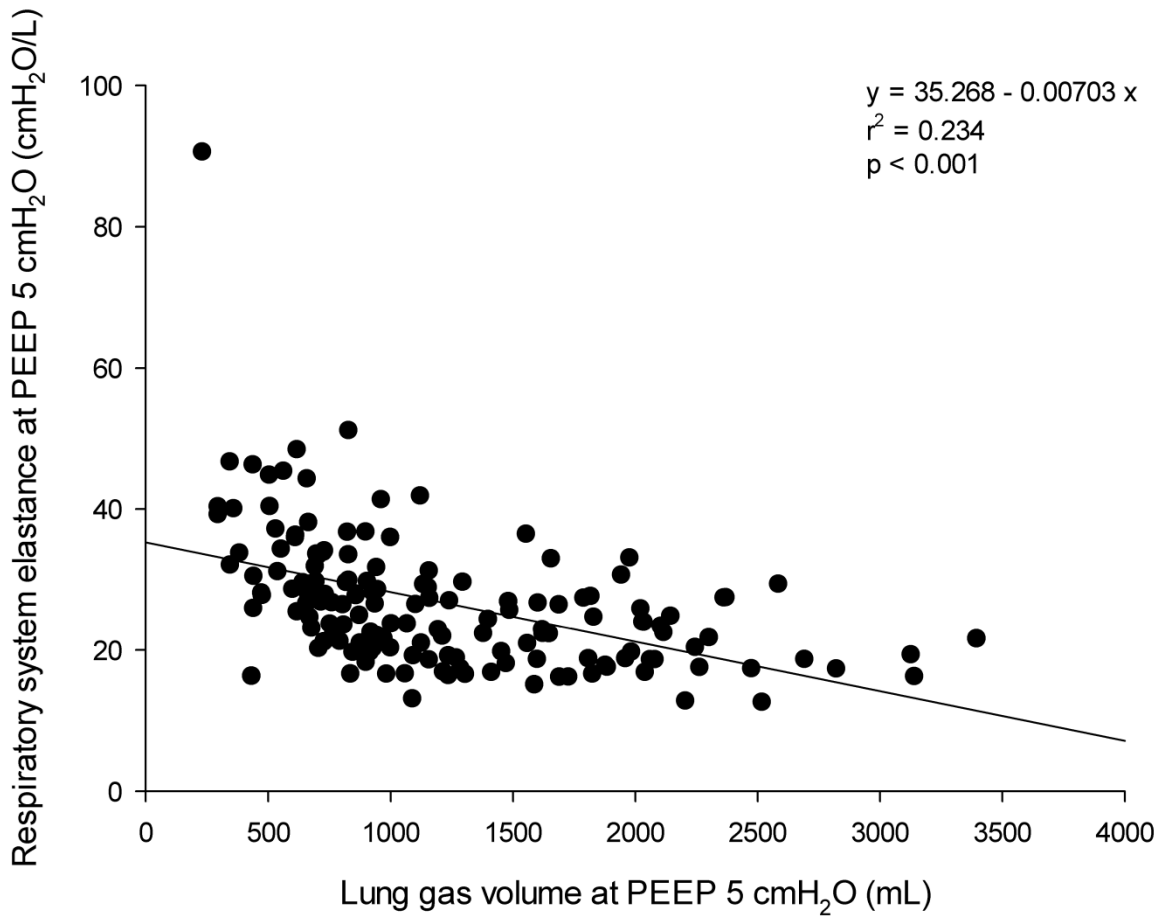

**Figure S2.** Linear regression between respiratory system elastance (cmH<sub>2</sub>O/L) and well-aerated lung tissue weight at PEEP 5 cmH<sub>2</sub>O (g).

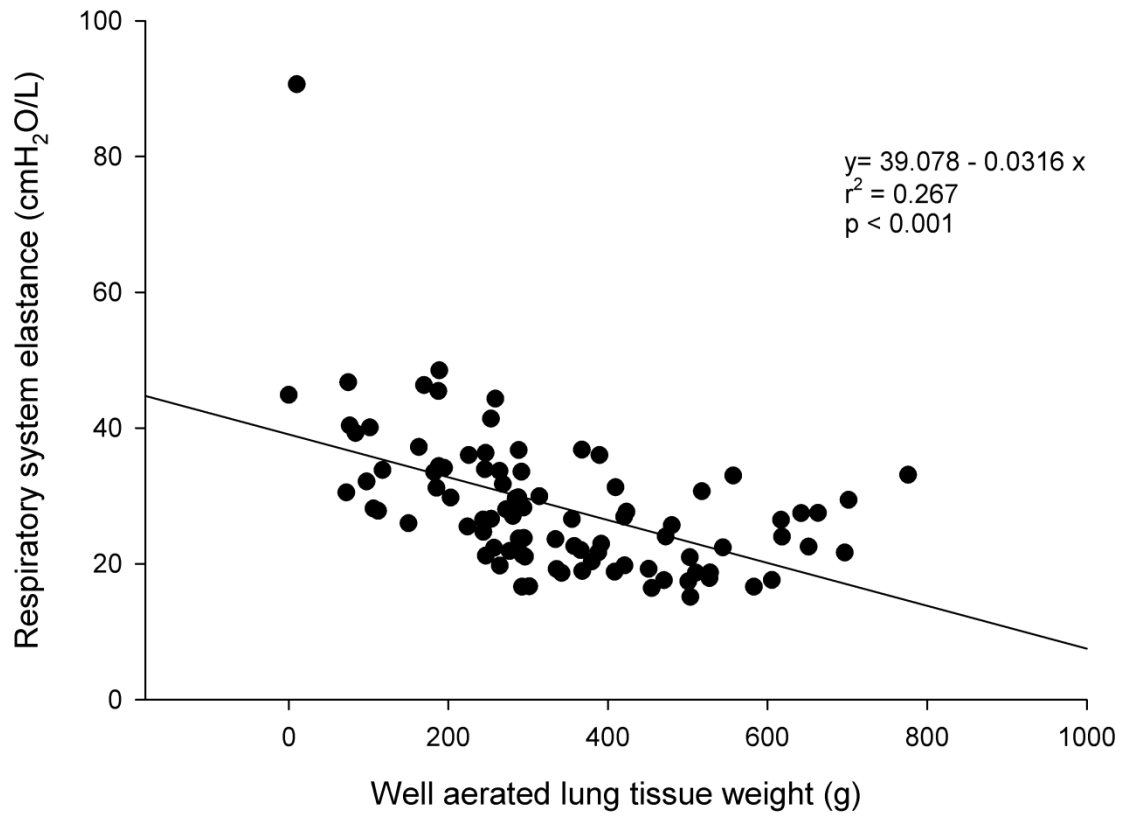



**Figure S3.** Linear regression between transpulmonary driving pressure (cmH<sub>2</sub>O) and lung stress (cmH<sub>2</sub>O) at PEEP 5 (upper panel) and 15 cmH<sub>2</sub>O (lower panel).

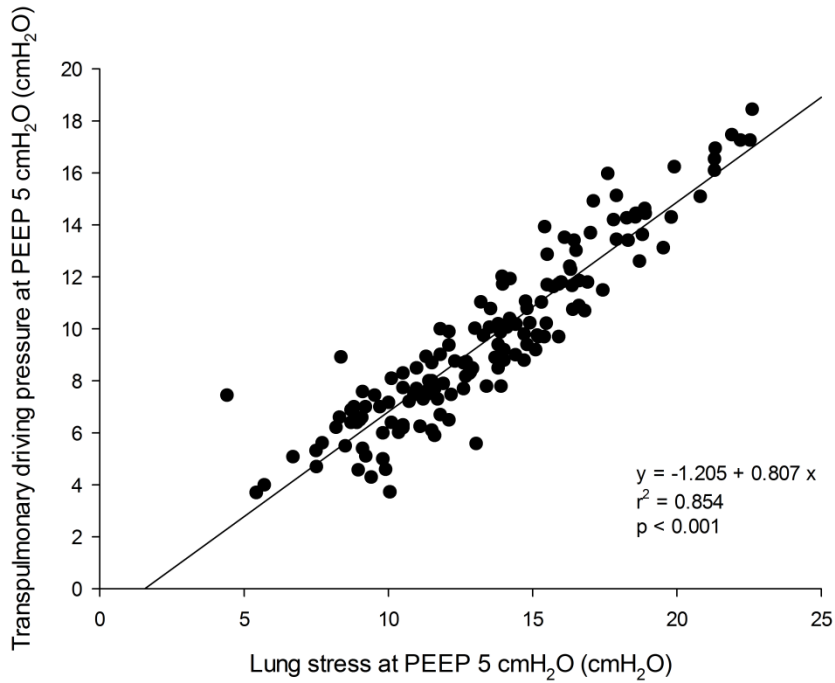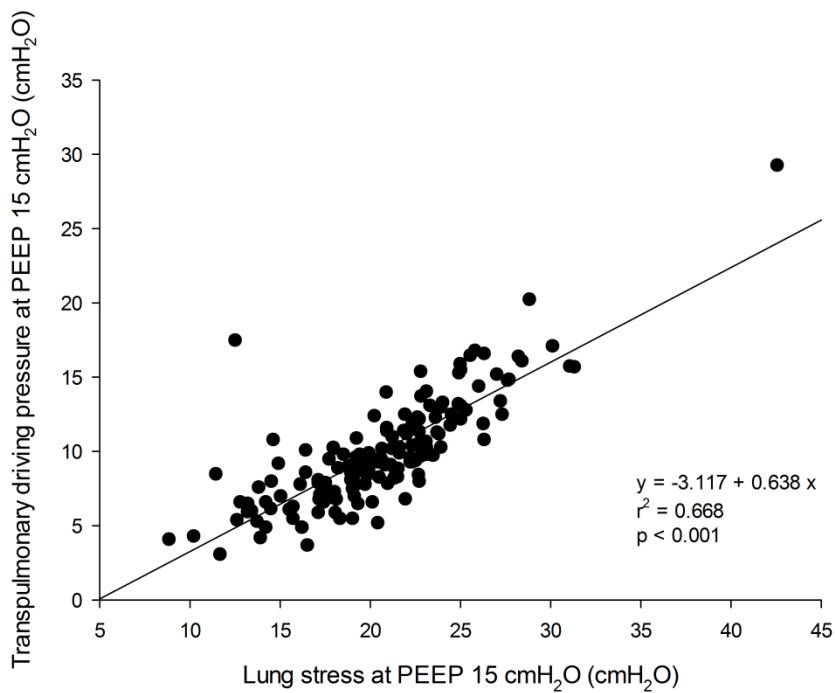

**Figure S4.** Linear regression between lung stress (cmH<sub>2</sub>O) and airway end-inspiratory plateau pressure (cmH<sub>2</sub>O).

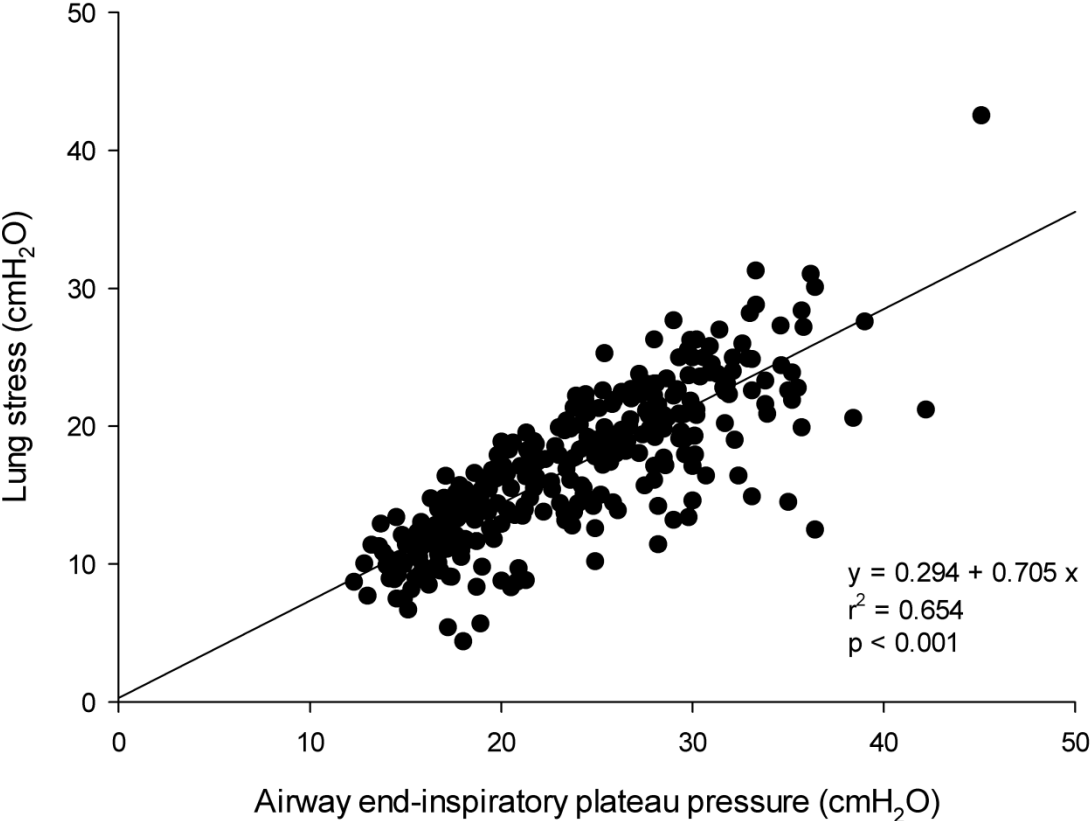

**Figure S5.** Linear regression between airway driving pressure (cmH<sub>2</sub>O) and lung gas volume (mL) at PEEP 5 cmH<sub>2</sub>O.

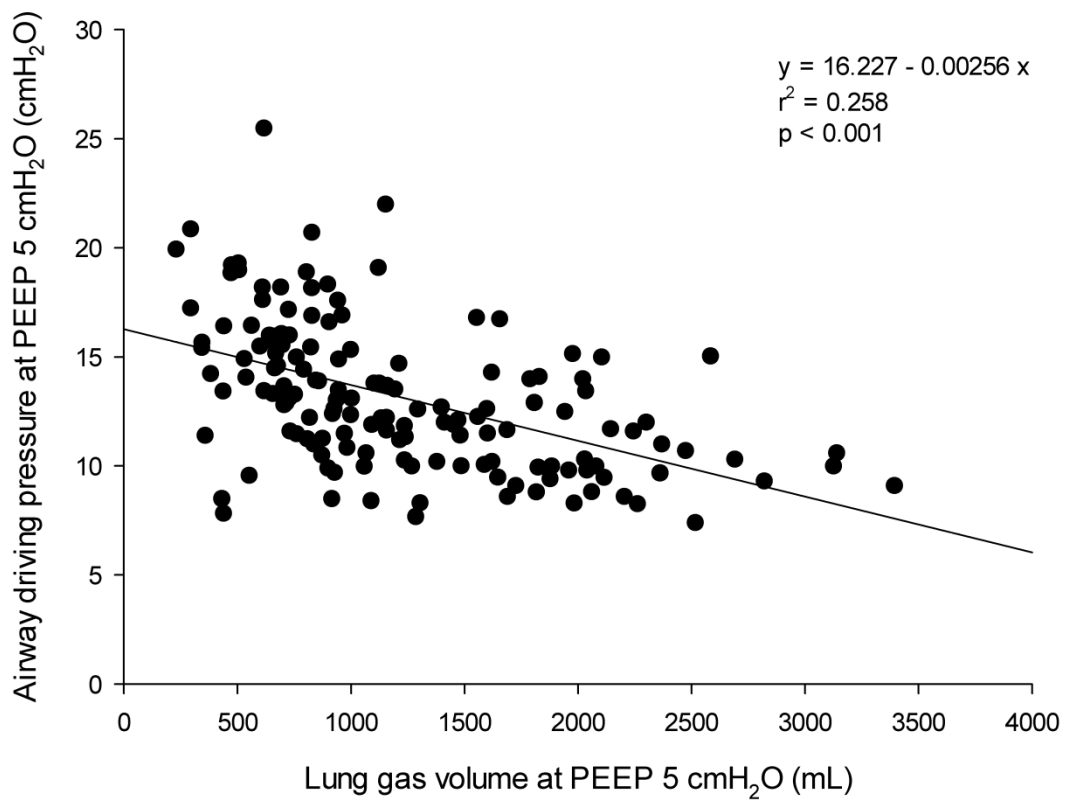

**Figure S6.** Receiver operator characteristic (ROC) curve for transpulmonary driving pressure as a predictor of lung stress above 24 (left panel) or 26 cmH<sub>2</sub>O (right panel).

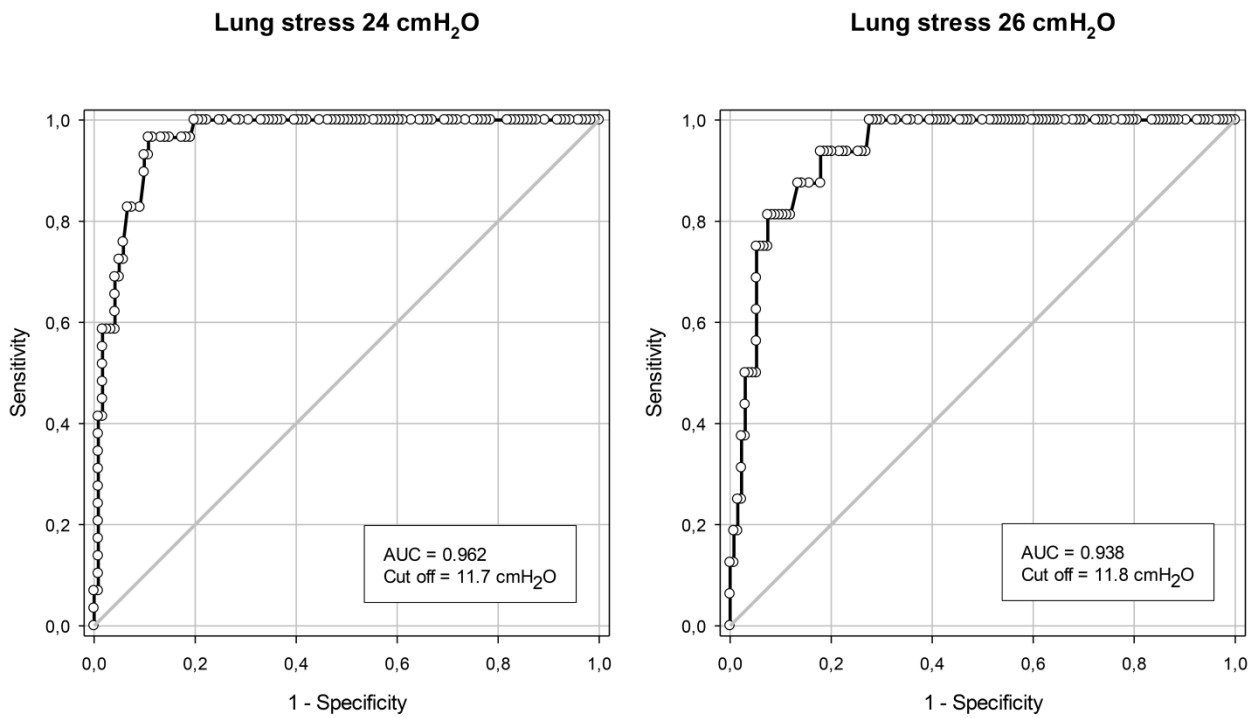

Supplement: MOESM1 [file 10604754]
